1 RUNNING HEAD: Neural correlates of mental calculation in blind

2

3 **Recruitment of occipital cortex by arithmetic processing follows computational bias in early**  
4 **blind**

5 Virginie Crollen<sup>a\*</sup>, Latifa Lazzouni<sup>b</sup>, Antoine Bellemare<sup>b</sup>, Mohamed Rezk<sup>c</sup>, Franco Lepore<sup>b</sup>,  
6 Marie-Pascale Noël<sup>c</sup>, Xavier, Seron<sup>c</sup>, and Olivier Collignon<sup>c\*</sup>

7

8 *a. Centre for Mind/Brain Science, University of Trento, Via delle regole 101, 38123,*  
9 *Mattarello (TN), Italy; b. Centre de Recherche en Neuropsychologie et Cognition (CERNEC),*  
10 *Université de Montréal, Pavillon Marie-Victorin, 90, rue Vincent d'Indy, Montréal, Québec*  
11 *H2V 2S9, Canada; c. Institute of Psychology (IPSY) and Institute of Neuroscience (IoNS),*  
12 *Université Catholique de Louvain, Place Cardinal Mercier 10, 1348 Louvain-la-Neuve,*  
13 *Belgium.*

14

15 **\* Corresponding authors:** Virginie Crollen, CIMEC – Center for Mind/Brain Sciences, University  
16 of Trento, via delle Regole 101, Mattarello (TN), Italy. Email: virginie.crollen@unitn.it. Tel :  
17 +390461283010 ; Olivier Collignon, Institute of Psychology (IPSY) and Institute of  
18 Neuroscience (IoNS), Université Catholique de Louvain, Belgium. Email :  
19 olivier.collignon@uclouvain.be.

20

21 **Keywords:** blindness, mental arithmetic, multiplication, neural correlates, subtraction.

22 **Abstract**

23 Arithmetic reasoning activates the occipital cortex of early blind people (EB). This activation  
24 of visual areas may reflect functional flexibility or the intrinsic computational role of specific  
25 occipital regions. We contrasted these competing hypotheses by characterizing the brain  
26 activity of EB and sighted participants while performing subtraction, multiplication and a  
27 control verbal task. In both groups, subtraction selectively activated a bilateral dorsal network  
28 commonly activated during spatial processing. Multiplication triggered more activity in  
29 temporal regions thought to participate in memory retrieval. No between-group difference  
30 was observed for the multiplication task whereas subtraction induced enhanced activity in the  
31 right dorsal occipital cortex of the blind individuals only. As this area overlaps and exhibits  
32 increased functional connectivity with regions showing selective tuning to auditory spatial  
33 processing, our results suggest that the recruitment of occipital regions during high-level  
34 cognition in the blind actually relates to the intrinsic computational role of the reorganized  
35 regions.

36

37

38

## 39 Introduction

40 Studies involving early blind people (EB) provide important insights into the role  
41 played by experience and intrinsic biological constraints in shaping the development of the  
42 sensory and cognitive tuning of brain regions. In early blind individuals, regions of the  
43 occipital cortex that typically process visual information massively enhance their response to  
44 non-visual inputs – a phenomenon called cross-modal plasticity (Bavelier and Neville 2002;  
45 Sadato et al. 1996). But what are the mechanisms guiding this cross-modal reorganization  
46 process?

47 It was suggested that these neuroplastic changes are constrained by the native  
48 functional organization of the occipital cortex. For example, hMT+/V5, a region chiefly  
49 dedicated to processing visual motion in the sighted reorganizes in the blind to preferentially  
50 process auditory (Dormal et al. 2016; Jiang et al. 2016; Poirier et al. 2006) and tactile motion  
51 (Ricciardi et al. 2007). Moreover, right dorsal occipital regions typically involved in visuospatial  
52 localization in the sighted are active when blind individuals localize sounds (Collignon et al.  
53 2011) and altering the function of this region with transcranial magnetic stimulation (TMS)  
54 selectively disrupts auditory localization in the blind (Collignon et al. 2007). Similarly, the visual  
55 word form area (VWFA), a region specialized to process visual orthographic information in the  
56 sighted seems to be selectively recruited in the blind when processing braille words (Büchel  
57 et al. 1998; Reich et al. 2011). Those studies suggest that even if the occipital cortex of blind  
58 individuals extends their tuning toward non-visual inputs, this reorganization process is not  
59 stochastic but is rather constrained by the maintenance of intrinsic computational bias of local  
60 regions (Collignon et al. 2009, 2012; Ricciardi et al. 2014; Heimler et al. 2015).

61           Contrasting with this view, it has been suggested that the occipital cortex of EB  
62 engages in higher-level cognitive operations that have apparently little to do with occipital  
63 functions such as memory (Amedi et al. 2003), language processing (Bedny et al. 2011; Röder  
64 et al. 2002) or numerical thinking (Kanjlia et al. 2016). Based on those observations, it has  
65 been proposed that the human cortex is functionally flexible early in life (Lane et al. 2015) and  
66 can adopt a wide range of distant computation depending on experience (Bedny 2017).

67           However, this later argument resides on the presupposition that higher-cognitive  
68 functions have no computational relation with vision. But is it the case? Actually, several  
69 studies have suggested that the foundations of numerical thinking were rooted in general  
70 visuo-spatial mechanisms (Burr and Ross 2008; Ross and Burr 2010; Simon 1999; Stoianov and  
71 Zorzi 2012). Arithmetic has for example been thought to involve shifts of attention along a  
72 mental number line: a shift of attention toward the right (or toward larger numbers) for  
73 addition and toward the left (smaller numbers) for subtraction (Knops et al. 2009a, 2009b;  
74 Masson et al. 2014; McCrink et al. 2007; Pinhas and Fischer 2008). Neuroimaging studies have  
75 similarly shown that the underlying neural architecture of number representations closely  
76 overlaps the one of visuo-spatial processing (Harvey et al. 2013; Shum et al. 2013; Sathian et  
77 al. 1999). For instance, topographic numerosity map (numerotopy) in which neural numerosity  
78 preferences progress gradually across the cortical surface (Harvey et al. 2013), analogous to  
79 sensory maps, have been found in occipital regions typically supporting visuo-spatial/motion  
80 processing (Harvey et al. 2017).

81           The present study was designed to test whether the recruitment of the occipital cortex  
82 in early blind individuals by higher-level cognitive functions depends on the intrinsic  
83 computational role of specific regions. The study of arithmetic processing represents an

84 interesting test-bed to help disentangling the hypotheses regarding the mechanisms  
85 governing cross-modal plasticity (functional recycling versus pluripotency). Indeed, separate  
86 arithmetic operations rely on separate brain networks depending on the computational  
87 principles they rely on. The resolution of subtraction principally engages a network of dorsal  
88 parieto-frontal regions (Chochon et al. 1999; Piazza et al. 2007) presumably due to the  
89 “spatial” strategies used to solve such operation (Siegler and Shrager 1984). Like subtraction,  
90 multiplication requires the mental manipulation of symbolic numbers, yet it is believed to rely  
91 on a distinct temporo-parietal network (Chochon et al. 1999; Zhou et al. 2007) presumably  
92 because multiplications are solved by direct fact retrieval (Cooney et al. 1988). This raises the  
93 question of whether these different operations produce equivalent neural responses in the  
94 occipital cortex of blind individuals, or if, as we presume, subtraction will find a privileged  
95 neuronal niche in dorsal occipital regions since these regions keep a privileged role in  
96 processing spatial relationship in congenitally blind (Dormal et al. 2012).

97         We characterized the brain activity of 14 congenitally blind and 16 sighted participants  
98 while verifying the results of subtractions and multiplications. If functional reorganization is  
99 similarly observed in congenitally blind for both arithmetic operations, this would support the  
100 idea that occipital regions are functionally flexible during development and can adopt a wide  
101 range of computation depending on experience (Bedny 2017). Alternatively, if solving  
102 subtraction problems (which in contrast to multiplication relies on spatial strategies)  
103 specifically engages regions of the dorsal occipital cortex typically involved in visuo-spatial  
104 processing, this will support the idea that the take-over of occipital regions by higher cognitive  
105 functions in the blind actually relies on the original computation of the reorganized regions.

106

## 107 Results

### 108 Behavioral results

109 Participants' performances were analyzed with a 3 (experimental conditions:  
110 subtraction, multiplication, letter) x 2 (groups: SC vs. CB) repeated measures ANOVA  
111 performed on the percentage of correct responses. This analysis showed a marginal effect of  
112 condition,  $F(2, 56) = 3.13, p = .05, \eta_p^2 = .10$ . Both groups tended to be less efficient in the  
113 subtraction condition ( $M \pm SE = 87.07 \pm 2.55$ ) than in the 2 other conditions ( $M \pm SE = 91.38$   
114  $\pm 1.29$  for multiplication;  $M \pm SE = 91.97 \pm 1.80$  for letters). The group effect was not  
115 significant,  $F(1, 28) = 0.09, p = .76, \eta_p^2 = .003$ , nor was the group x condition interaction,  $F(2,$   
116  $56) = 0.76, p = .47, \eta_p^2 = .03$  (see Figure 1j).

### 117 fMRI results

118 **General Arithmetic.** A conjunction analysis performed across groups disclosed  
119 arithmetic selectivity in the left Angular Gyrus (AG) for both groups. To investigate the effect  
120 of congenital blindness on global arithmetic processing, we compared the cerebral responses  
121 of blind vs. sighted participants for both multiplication and subtraction relative to the letter  
122 condition ([CB > SC] [subtraction  $\cap$  multiplication > letter]). This analysis yielded significant  
123 results in the left middle occipital gyrus (see Figure 1 and Table 1). The opposite contrast ([SC  
124 > CB] [subtraction  $\cap$  multiplication > letter]) did not yield any significant effect.

125 **Subtraction.** The frontal eye field (FEF) and the PSPL demonstrated enhanced activity  
126 for subtraction over multiplication in both groups of participants ([SC  $\cap$  CB] [subtraction >  
127 multiplication]). Crucially, the right middle/superior occipital gyrus (MOG) demonstrated  
128 enhanced activity in CB when compared to SC ([CB > SC] [subtraction > multiplication]). In  
129 general, deactivation of this region was found in the sighted while activation was observed in

130 CB (see Figure 1 and Table 1). Interestingly and as shown in Figure 2, part of this region also  
131 shows selective tuning to auditory spatial processing in the blind (7). The opposite contrast  
132 ([SC > CB] [subtraction > multiplication]) did not yield any significant effect.

133 **Multiplication.** There was common multiplication related activity in SC and CB ([SC  $\cap$   
134 CB] [multiplication > subtraction]) in the right Superior Temporal Gyrus (STG) (see Figure 1  
135 and Table 1). Neither the contrast ([CB > SC] [multiplication > subtraction]), nor the contrast  
136 ([SC > CB] [multiplication > subtraction]) yielded significant effects.

137 **Functional connectivity.** We found increased correlations between the left MOG and  
138 a network of dorsal regions in blind relative to sighted participants (main effect of group, seed  
139 to whole-cortex analysis  $P < 0.05$ , FDR corrected; Figure 3 and Table 2). A similar pattern was  
140 observed for the right MOG ( $P < 0.05$ , FDR corrected; Figure 3 and Table 2). Moreover, both  
141 seed regions showed enhanced intra-occipital connectivity with ventral occipito-temporal  
142 regions as previously shown (Burton et al. 2014; Pelland et al. 2017).

143

## 144 Discussion

145 We examined how the lack of visual experience impacts on the neuronal basis of  
146 specific arithmetical operations by contrasting activity maps elicited by the execution of  
147 subtraction or multiplication operations in EB and sighted controls.

148 Reorganization of occipital regions in case of early blindness provides a unique model  
149 for understanding how intrinsic physiology and experience together determine cortical  
150 function. Previous studies have found that the “visual” cortex of early blind people responds  
151 to a variety of auditory (Collignon et al. 2009; Gougoux et al. 2005; Ricciardi et al. 2014;  
152 Weeks et al. 2000) and tactile tasks (Büchel et al. 1998, Sadato et al. 1996).

153           Several studies have shown that such cross-modal plasticity follows organizational  
154 principles that maintain the functional specialization of the colonized brain regions (Amedi,  
155 Hofstetter, Maidenbaum, & Heimler, 2017; Bi, Wang, & Caramazza, 2016; Dormal and  
156 Collignon, 2011; Cecchetti et al. 2016; Heimler et al. 2015). However, the observation that  
157 the occipital cortex of congenitally blind also activates during higher cognitive functions  
158 considered distant from visual function, such as arithmetic processing (Kanjlia et al. 2016), was  
159 used to challenge the idea that the maintenance of intrinsic computational bias is a generic  
160 principle guiding the mechanism of cross-modal plasticity. In contrast, it was supposed that  
161 occipital regions are pluripotent early in development and able to engage in a vast array of  
162 distant cognitive functions that are evolutionary and cognitively distant from vision (Bedny  
163 2017).

164           Our observation that specific arithmetic operation – subtraction but not multiplication  
165 – triggers enhanced activity in selective occipital regions -the right dorsal stream- provides  
166 unifying lights between these two apparently discrepant views of occipital (re)organization in  
167 congenitally blind people. Our findings suggest that the cross-modal recruitment of occipital  
168 regions for higher cognitive operations does not fully depart from its original function but  
169 rather emerges from intrinsic computational bias. More precisely, we suggest that the specific  
170 recruitment of dorsal occipital regions for subtraction is a by-product of the intrinsic role of  
171 this region for spatial processing (Knops et al. 2009a, 2009b; Masson et al. 2014; McCrink et  
172 al. 2007; Pinhas and Fischer 2008). Supporting this idea, region showing selective activation  
173 for subtraction in our blind population overlapped in part with regions showing preferential  
174 tuning to auditory spatial processing in the blind (Collignon et al. 2011; see Figure 3).



175           It was proposed that specific numerical processing systematically maps onto parietal  
176 circuits because this culturally new invention grounds on, or recycle, more ‘basic-primitive’  
177 cognitive skills, like space perception or body manipulation, which are evolutionary more  
178 ancient (Dehaene and Cohen 2007). We propose that a similar mechanism of functionally  
179 specific cortical recycling operates at the ontogenetic level due to experience-dependent  
180 neuroplasticity triggered by blindness. Here, subtraction selectively remaps onto dorsal  
181 occipital regions due to its reliance on space processing, known to be preserved in these  
182 regions in congenitally blind individuals (Dormal et al. 2012). We therefore propose that the  
183 recruitment of occipital regions in the blind, even for higher cognitive abilities, finds its  
184 “neuronal niche” into a set of circuits that are sufficiently close to the required function and  
185 sufficiently plastic as to strengthen or reorient a significant fraction of their neural resources  
186 for the non-visual function (Collignon et al. 2009). Interestingly, this raises the possibility that  
187 other higher cognitive domains like language, known to also remap in the occipital cortex of  
188 the blind (Bedny et al. 2011; Röder et al. 2002), also grounds on the native computational  
189 predisposition of these regions (Hasson et al. 2016; van Ackeren et al. 2017).

190           What could be the mechanistic force guiding this functionally specific reorganization?  
191 As illustrated by our connectivity analyses (see Figure 3), the right dorsal occipital region  
192 showing enhanced preferential involvement for subtraction in EB also shows enhanced  
193 connectivity with a right dorsal network typically involved in spatial processing and attention  
194 (Corbetta et al. 1995; Yantis et al. 2003). This result supports the idea that a biased inborn  
195 connectivity profile between brain regions may guide the functional specialization of brain  
196 regions and, by extension, constraints how cross-modal plasticity expresses in the occipital  
197 cortex of the blind (Hannagan et al. 2015). In the context of our study, the reinforcement of a

198 privileged connection between dorsal occipital regions and the intraparietal sulcus, probably  
199 rooted on common involvement in spatial computation, will extend the preserved function of  
200 the parietal cortex (eg. for subtraction) toward dorsal occipital regions in case of early visual  
201 deprivation.

202 This additional involvement of dorsal occipital regions for subtraction in EB inevitably  
203 raises the question of what is happening to the network typically involved in this function.  
204 Even if in our study we did not find any enhanced activity in sighted versus blind participants,  
205 previous studies have suggested that the enhanced occipital involvement in EB may be  
206 concomitant to a reduction of the computational load of the typical network (Dormal et al.  
207 2016).

208 The left AG was the unique region in which both subtraction and multiplication  
209 produced superior activity than the letter control task in both sighted and blind individuals  
210 (Figure 1). Precisely, this region was less deactivated during calculation than when processing  
211 letters in both groups. Deactivation has been consistently reported during arithmetic tasks  
212 (Grabner et al. 2007; Mizuhara et al. 2005; Rickard et al. 2000; Wu et al. 2009; Zhou et al.  
213 2007) and has been shown to be negatively correlated to mathematical performance: stronger  
214 is the deactivation, lower is the arithmetic performance (Wu et al. 2009).

215 More importantly, we demonstrate that specific arithmetic operations activate  
216 selective networks: subtraction preferentially activated the FEF and the PSPL regions while  
217 the right STG was activated for multiplication in both groups. This dissociation between  
218 parieto-frontal regions for subtraction and superior temporal regions for multiplication  
219 supports the idea that arithmetic is processed in different formats within distinct cerebral  
220 pathways (Dehaene and Cohen 1997). Therefore, visual experience does not have a

221 foundational role in setting-up the functional segregation between subtraction and  
222 multiplication. The evidence that the neural representation of numbers is not tied to visual  
223 abilities or experience demonstrate that numerical concepts can be acquired through non-  
224 visual mechanisms (Dormal et al. 2016; Crollen et al. 2017). A recent study also showed that  
225 blind individuals activate parietal regions to solve subtraction (Kanjlia et al. 2016). However,  
226 this study did not investigate functional selectivity for specific arithmetical operation. We  
227 therefore confirm and extend these results by showing that the dissociation of brain regions  
228 supporting specific arithmetic operation is preserved in blind people.

229 Does this overlap of the brain circuits involved in arithmetic processing in early blind  
230 and sighted individuals means that the way these regions implement numerical processing is  
231 immune to visual input and experience? One possibility is that those selective neural networks  
232 supporting specific numerical operations rely on computational procedures, like memory  
233 retrieval for multiplication and spatial processing for subtraction (Campbell and Xue, 2001).  
234 These procedures may be abstracted from sensory input and experience and may therefore  
235 be built on amodal representational format (Damarla et al. 2016; Eger et al. 2003; Nieder  
236 2012, 2016). However, the fact that similar regions activate in blind and sighted individuals  
237 during the same specific task (i.e., parietal network during subtraction) does not guarantee  
238 that the specific format of the cognitive operation is similar across both groups. Indeed, if the  
239 lack of vision does not preclude the optimal development of various numerical skills (Dormal  
240 et al. 2016; Castronovo 2014; Crollen and Collignon 2016), some qualitative properties of  
241 numerical representations seems however to critically depend on early visual experience. For  
242 example, early blindness changes the nature of the reference frame in which the spatial  
243 processing of numbers occurs: while sighted and late blind participants associate numbers to

244 an external frame of reference, congenitally blind individuals principally rely on an association  
245 between numbers and an egocentric coordinate system (Crollen et al. 2013). Blindness also  
246 alters the typical development of finger-counting, a procedure often used by sighted  
247 individuals while learning basic addition and subtraction operations (Crollen et al. 2011, 2014).  
248 Given that early blindness affects the use of an external visuo-spatial frame of reference and  
249 the implementation of finger-counting, it is possible that the common regions involved in  
250 numerical processing in both groups rely on distinct representational format in early blind and  
251 sighted individuals. It will therefore be important for future studies to assess whether the  
252 representations of the numerical information embedded in those brain circuits are truly  
253 independent of visual experience or if visual experience influences the format of these  
254 representations despite overlapping activation.

255

## 256 **Materials and Methods**

### 257 **Participants**

258 Sixteen sighted controls (SC) [6 females, age range 22-64 y, (mean  $\pm$  SD, 44  $\pm$  14 y)]  
259 and 14 congenitally blind (CB) participants [3 females, age range 23-61 y, (mean  $\pm$  SD, 44  $\pm$   
260 13 y)] took part in the study (see supplemental table 1 for a detailed description of the CB  
261 participants). The SC did not statistically differ from the CB group for age ( $t(28) = -0.02, p >$   
262  $.9$ ) and sex ratio ( $\chi^2 = 1.54, p = .21$ ). The participants in the blind group were totally blind  
263 since birth or had, at the utmost, only rudimentary sensitivity for brightness differences and  
264 never experienced patterned vision (never saw colors, shapes, or motion). In all cases,  
265 blindness was attributed to peripheral deficits with no additional neurological problems.  
266 Procedures were approved by the Research Ethics Boards of the University of Montreal.

267 Experiments were undertaken with the understanding and written consent of each participant.  
268 Sighted participants were blindfolded when performing the task.

269

## 270 **Task and general experimental design**

271 Participants were scanned in 1 fMRI session using a block design procedure. During  
272 scanning, participants had to: 1) verify the result of subtractions; 2) verify the result of  
273 multiplications; and 3) perform vowel/consonant judgment verification on letters. Additions  
274 were not presented as they are thought to not only involve spatial displacements on the  
275 mental number line but are also assumed to rely on rote verbal memory (Dehaene & Cohen,  
276 1997). In the subtraction verification task, triplets of auditory numbers were presented and  
277 participants had to judge whether the third number corresponded to the difference of the  
278 first two numbers. The first operand was either 11 or 13; the second operand ranged from 3  
279 to 8. The third number was either the correct result of the subtraction or the correct result  $\pm$   
280 1. In the multiplication verification task, triplets of auditory numbers were presented and  
281 participants had to judge whether the third number corresponded to the product of the first  
282 2 numbers. The first operand was either 3 or 4. The second operand ranged from 3 to 8. The  
283 third number presented corresponded either to the correct result or to the correct result  $\pm$   
284 the first operand (e.g., three, five, twelve). In order to examine the neural activity of arithmetic  
285 in general (common activity for subtraction and multiplication), participants had also to  
286 perform a control letter task. This task was matched to the numerical tasks in terms of stimuli  
287 presentation (3 consecutive – non-numerical – symbolic stimuli) and response requirements.  
288 Triplets of letters were thus auditory presented and participants had to judge whether the  
289 third letter pertained to the same category (vowel vs. consonant) as the first 2 letters (the first

290 2 letters were always of the same category). The letters used were the vowels A, E, I, O, U  
291 and the consonants B, D, M, N, P, R, S. Participants responded with their right index finger  
292 using the top (for correct triplet) or the bottom (for incorrect triplet) key of a response box.

293 The fMRI session consisted of 30 successive blocks (24 s duration each) alternating the  
294 three tasks in a fixed order and separated by rest periods ranging from 7 to 9 s (median 8 s).  
295 Each block consisted of 6 successive auditory triplets of 4000 ms. In the scanner, auditory  
296 stimuli were delivered by means of circumaural fMRI-compatible headphones (Mr Confon,  
297 Magdeburg, Germany).

298 Before the fMRI acquisition, all participants underwent a training session in a mock  
299 scanner with recorded scanner noise played in the bore of the stimulator to familiarize them  
300 with the fMRI environment and to ensure that the participants understood the task.

301

## 302 **fMRI data acquisition and analyses**

303 Functional MRI-series were acquired using a 3-T TRIO TIM system (Siemens, Erlangen,  
304 Germany), equipped with a 12-channel head coil. Multislice T2\*-weighted fMRI images were  
305 obtained with a gradient echo-planar sequence using axial slice orientation (TR = 2200 ms,  
306 TE = 30 ms, FA = 90°, 35 transverse slices, 3.2 mm slice thickness, 0.8 mm inter-slice gap,  
307 FoV = 192×192 mm<sup>2</sup>, matrix size = 64×64×35, voxel size = 3×3×3.2 mm<sup>3</sup>). Slices were  
308 sequentially acquired along the z-axis in feet-to-head direction. The 4 initial scans were  
309 discarded to allow for steady state magnetization. Participants' head was immobilized with  
310 the use of foam pads that applied pressure onto the headphones. A structural T1-weighted  
311 3D MP-RAGE sequence (voxel size= 1x1x1.2 mm<sup>3</sup>; matrix size= 240x256; TR= 2300 ms, TE=  
312 2.91 ms, TI= 900 ms, FoV= 256; 160 slices) was also acquired for all participants.

313 Functional volumes were pre-processed and analyzed using SPM8  
314 (<http://www.fil.ion.ucl.ac.uk/spm/software/spm8/>; Wellcome Department of Imaging  
315 Neuroscience, London), implemented in MATLAB (MathWorks). Pre-processing included slice  
316 timing correction of the functional time series (Sladky et al. 2011), realignment of functional  
317 time series, co-registration of functional and anatomical data, a spatial normalization to an  
318 echo planar imaging template conforming to the Montreal Neurological institute space, and  
319 a spatial smoothing (Gaussian kernel, 8mm full-width at half-maximum, FWHM).

320 Following pre-processing steps, the analysis of fMRI data, based on a mixed effects  
321 model, was conducted in two serial steps accounting respectively for fixed and random  
322 effects. For each subject, changes in brain regional responses were estimated through a  
323 general linear model including the responses to the 3 experimental conditions (subtractions,  
324 multiplications, letters). These regressors consisted of a boxcar function convolved with a  
325 canonical double-gamma hemodynamic response function. Movement parameters derived  
326 from realignment of the functional volumes (translations in x, y and z directions and rotations  
327 around x, y and z axes) and a constant vector were also included as covariates of no interest.  
328 High-pass filtering was implemented in the design matrix using a cut-off period of 128 s to  
329 remove slow drifts from the time series. Linear contrasts tested the main effect of each  
330 condition ([Subtraction], [Multiplication], [Letter]), the main effect of arithmetic ([Subtraction  $\cap$   
331 Multiplication>Letter]), the main effect of the Subtraction condition  
332 ([Subtraction>Multiplication]) and the main effect of the multiplication condition  
333 ([Multiplication>Subtraction]). These linear contrasts generated statistical parametric maps  
334 [SPM(T)]. The resulting contrast images were then further spatially smoothed (Gaussian kernel  
335 8 mm FWHM) and entered in a second-level analysis, corresponding to a random effects

336 model, accounting for inter-subject variance. For each contrast, one-sample t-tests were  
337 carried out in each group separately. Two-sample t-tests were then computed to identify  
338 group differences for each separate contrast. Group effects [Blind>Sighted] and  
339 [Sighted>Blind] were inclusively masked ( $p < 0.001$  uncorrected for multiple comparisons) by  
340 the main effect in the blind and the sighted group, respectively. Statistical inferences were  
341 performed at a threshold of  $p < 0.05$  after correction for multiple comparisons (Family Wise  
342 Error method) over the entire brain volume or over small spherical volumes (10 mm radius)  
343 located in regions of interest (SVC). To select the coordinates of interest, we consulted a body  
344 of literature examining brain activations related to numerical processing in sighted individuals  
345 and related to functionally specific cross-modal plasticity in the blind. Before performing any  
346 small-volume correction (SVC), peaks reported in Talairach space (Talairach and Tournoux  
347 1988) were transformed to Montreal Neurological Institute space using Matthew Brett's  
348 bilinear transformation (<http://imaging.mrc-cbu.cam.ac.uk/imaging/MniTalairach>). Standard  
349 stereotactic coordinates (x,y,z) used for SVC are listed in supplemental material (in MNI space).

350

### 351 **Resting-State Functional Connectivity Analysis.**

352 To control for possible motion artifacts, a scrubbing approach was implemented using  
353 Artifact detection tools (ART; [www.nitrc.org/projects/artifact\\_detect](http://www.nitrc.org/projects/artifact_detect)) to identify outlier  
354 volumes that had a difference in scan-to-scan global intensity more than 9 standard deviations  
355 away from the mean global brain signal, or volumes that had more than 2 mm of scan-to-scan  
356 composite motion. The outlier time points were used as a first level covariate. Afterwards, the  
357 functional volumes were spatially smoothed with a 4-mm full-width half-maximum (FWHM)  
358 Gaussian kernel. To rule out the possibility that any connectivity changes could be attributed



359 to motion (Power et al. 2012; Satterthwaite et al. 2012; Van Dijk et al. 2012), we compared  
360 the average and maximum motion between groups using a two-sample t-test, and found no  
361 significant difference between the 2 groups in the average ( $t(22)=0.35$ ,  $p=0.73$ ) or the  
362 maximum motion ( $t(22)=0.67$ ,  $p=0.508$ ).

363 Functional connectivity analysis was performed in CONN functional connectivity  
364 toolbox (Whitfield-Gabrieli and Nieto-Castanon 2012); <http://www.nitrc.org/projects/conn>). A  
365 component-based noise correction (Compcorr) (Behzadi et al. 2007) strategy was  
366 implemented to control for nuisance effects and physiological noise. Motion parameters and  
367 their first derivatives, and outlier time points from ART toolbox were included as first level  
368 covariates to remove the variance related to head motion. Linear de-trending and a band-  
369 pass filter of 0.008-0.09Hz was applied to the functional data. First level analysis was  
370 performed in the CONN framework to investigate functional connectivity changes within-  
371 subject. Pearson's correlation coefficient was used as a measure of functional connectivity. A  
372 seed-based correlation analysis using a voxel-wise approach was performed. We used the left  
373 and right middle occipital gyri as our seed regions because these regions showed cross-modal  
374 plasticity for the contrasts [CB>SC][Subtraction $\cap$ Multiplication>Letter] and  
375 [CB>SC][Subtraction>Multiplication] – see results section.

376 The time series from each seed region was extracted by averaging the signal from all  
377 the voxels in the seed ROI. The time series from each seed was then correlated with each  
378 voxel in the rest of the brain. The correlation coefficients were fisher transformed to perform  
379 second-level statistical comparison across groups. One-sided two-samples t-test was  
380 performed to assess differences in the functional connectivity between groups [CB > SC].

381 Results were thresholded at  $p < 0.001$  at the voxel level and FDR-corrected  $p < 0.05$  at the  
382 cluster level.

383

### 384 **Acknowledgments**

385 The authors are grateful to Giulia Dormal for her help in implementing the design of this  
386 study. This research and the authors were supported by the Canada Research Chair Program  
387 (FL), the Canadian Institutes of Health Research (FL), the Belgian National Funds for Scientific  
388 Research (OC, MPN), a WBI.World grant (VC), the European Union's Horizon 2020 research  
389 and innovation program under the Marie Skłodowska-Curie grant agreement No 700057 (VC)  
390 and the 'MADVIS' European Research Council starting grant (OC; ERC-StG 337573).

391

### 392 **Competing financial interests**

393 The authors declare that they have any financial interests that could be construed to have  
394 influenced their paper.

395

### 396 **References**

397

398 Amedi, A., Hofstetter, S., Maidenbaum, S., & Heimler, B. 2017. Task selectivity as a  
399 comprehensive principle for brain organization. *Trends Cogn Sci.* 5: 307-310.

400

401 Amedi A, Raz N, Pianka P, Malach R, Zohary E. 2003. Early "visual" cortex activation correlates  
402 with superior verbal memory performance in the blind. *Nat Neurosci.* 6(7): 758-766.

403

404 Andres M, Michaux N, Pesenti M. 2012. Common substrate for mental arithmetic and finger  
405 representation in the parietal cortex. *Neuroimage*. 62: 1520-1528.

406

407 Arsalidou M, Taylor MJ. 2011. Is  $2+2 = 4$ ? Meta-analyses of brain areas needed for numbers  
408 and calculations. *NeuroImage*. 54: 2382-2393.

409

410 Bavelier D, Neville, HJ. 2002. Cross-modal plasticity: where and how? *Nat Rev Neurosci*. 3:  
411 443-452.

412

413 Bedny M. 2017. Evidence from blindness for a cognitively pluripotent cortex. *Trends Cogn  
414 Sci*. 21(9): 637-648.

415

416 Bedny M, Pascual-Leone A, Dodell-Feder D, Fedorenko F, Saxe R. 2011. Language  
417 processing in the occipital cortex of congenitally blind adults. *Proc Natl Acad Sci USA*. 108(11):  
418 4429-4434.

419

420 Behzadi Y, Restom K, Liao J, Liu TT. 2007. A component based noise correction method  
421 (CompCor) for BOLD and perfusion based fMRI. *Neuroimage*. 37(1): 90-101.

422

423 Bi, Y., Wang, X., & Caramazza, A. 2016. Object domain and modality in the ventral visual  
424 pathway. *Trends Cogn Sci*. 20(4): 282-290.

425

426 Büchel C, Price C, Frackowiak RSJ, Friston K. 1998. Different activation patterns in the visual  
427 cortex of late and congenitally blind subjects. *Brain*. 121(3): 409-419.

428

429 Büchel C, Price C, Friston K. 1998. A multimodal language region in the ventral visual  
430 pathway. *Nature*. 394: 274-277.

431

432 Burr D, Ross J. 2008. A visual sense of number. *Curr Biol*. 18: 425-428.

433

434 Burton H, Snyder AZ, Raichle ME. 2014. Resting state functional connectivity in early blind  
435 humans. *Front Syst Neurosci*. 8: 51.

436

437 Campbell JID, Xue Q. 2001. Cognitive arithmetic across cultures. *J Exp Psychol Gen*. 130 (2):  
438 299-315.

439

440 Castronovo J. 2014. Numbers in the dark: Numerical cognition and blindness. In Cohen  
441 Kadosh R and Dowker A, editors. *The Oxford Handbook of Numerical Cognition*. Oxford:  
442 Oxford University Press. pp. 787-807.

443

444 Cecchetti L, Kupers R, Ptito M, Pietrini P, Ricciradi E. 2016. Are supramodality and cross-modal  
445 plasticity the yin and yang of brain development? From blindness to rehabilitation. *Front Syst*  
446 *Neurosci*. 10: 89.

447

448 Chochon F, Cohen L, van de Moortele PF, Dehaene S. 1999. Differential contributions of the  
449 left and right inferior parietal lobules to number processing. *J Cogn Neurosci*. 11(6): 617-630.

450

451 Collignon O, Dormal G, Lepore F. 2012. Building the Brain in the Dark: Functional and Specific  
452 Crossmodal Reorganization in the Occipital Cortex of Blind Individuals. In Steeves JKE, Harris  
453 LR, editors. *Plasticity in sensory systems*. Cambridge University Press. pp 73-96.

454

455 Collignon O, Lassonde M, Lepore F, Bastien D, Veraart C. 2007. Functional cerebral  
456 reorganization for auditory spatial processing and auditory substitution of vision in early blind  
457 subjects. *Cereb Cortex*. 17(2): 457-465.

458

459 Collignon O, Vandewalle G, Voss P, Albouy G, Charbonneau G, Lassonde M, Lepore F. 2011.  
460 Functional specialization for auditory-spatial processing in the occipital cortex of congenitally  
461 blind humans. *Proc Natl Acad Sci USA*. 108(11): 4435–4440.

462

463 Collignon O, Voss P, Lassonde M, Lepore F. 2009. Cross-modal plasticity for the spatial  
464 processing of sounds in visually deprived subjects. *Exp Brain Res*. 192(3): 343-358.

465

466 Cooney JB, Swanson HL, Ladd SF. 1988. Acquisition of mental multiplication skill: Evidence  
467 for the transition between counting and retrieval strategies. *Cognition & Instruction*. 5: 323-  
468 345.

469

470 Corbetta M, Shulman GL, Miezin FM, Petersen SE. 1995. Superior Parietal Cortex Activation  
471 During Spatial Attention Shifts and Visual Feature Conjunction. *Science*. 270(5237): 802-805.

472

473 Crollen V, Collignon O. 2016. Cognition numérique : que peuvent nous apprendre les  
474 personnes non-voyantes ? *Med Sci*. 32: 1097-1102.

475

476 Crollen V, Collignon O, Noël MP. 2017. Visuo-spatial processes as a domain-general factor of  
477 numerical development in atypical populations. *Journal of Numerical Cognition*. 3(2).  
478 doi:10.5964/jnc.v3i2.68.

479

480 Crollen V, Dormal G, Seron X, Lepore F, Collignon O. 2013. Embodied numbers: The role of  
481 vision in the development of number-space interactions. *Cortex*. 49: 276–283.

482

483 Crollen V, Mahe R, Collignon O, Seron X. 2011. The role of vision in the development of  
484 finger-number interactions: Finger-counting and finger-montring in blind children. *J Exp Child*  
485 *Psychol*. 109: 525-539.

486

487 Crollen V, Noël MP. 2015. Spatial and numerical processing in children with high and low  
488 visuo-spatial abilities. *J Exp Child Psychol*. 132: 84-98.

489

490 Crollen V, Noël MP, Seron X, Mahau P, Lepore F, Collignon O. 2014. Visual experience  
491 influences the interactions between fingers and numbers. *Cognition*. 133: 91-96.

492

- 493 Crollen V, Vanderclausen C, Allaire F, Pollaris A, Noël MP. 2015. Spatial and numerical  
494 processing in children with non-verbal learning disabilities. *Res Dev Disabil.* 47: 61-72.  
495
- 496 Damarla, S.R., Cherkassky, V.L., & Just, M.A. 2016. Modality-independent representations of  
497 small quantities based on brain activation patterns. *Hum Brain Mapp.* 37(4), 1296-1307.  
498
- 499 Dehaene S, Cohen L. 1997. Cerebral pathways for calculation: double dissociation between  
500 rote verbal and quantities knowledge of arithmetic. *Cortex.* 33 (2): 219-250.  
501
- 502 Dehaene S, Cohen L. 2007. Cultural recycling of cortical maps. *Neuron.* 56(2): 384-398.  
503
- 504 Dehaene S, Piazza M, Pinel P, Cohen L. 2003. Three parietal circuits for number processing.  
505 *Cogn Neuropsychol.* 20 (3-6): 487-506.  
506
- 507 Dormal G, Collignon O. 2011. Functional selectivity in sensory-deprived cortices. *J*  
508 *Neurophysiol.* 105(6): 2627-2630.  
509
- 510 Dormal G, Lepore F, Collignon O. 2012. Plasticity of the dorsal « spatial » stream in visually  
511 deprived individuals. *Neural Plast.* 2012:687659.  
512
- 513 Dormal G, Rezk M, Yakobov E, Lepore F, Collignon O. 2016. Auditory motion in the sighted  
514 and blind: early visual deprivation triggers a large-scale imbalance between auditory and  
515 « visual » brain regions. *Neuroimage.* 134: 630-644.

516

517 Dormal V, Crollen V, Baumans C, Lepore F, Collignon O. 2016. Early but not late blindness  
518 leads to enhanced arithmetic and working memory abilities. *Cortex*. 83: 212-221.

519

520 Dormal V, Schuller AM, Nihoul J, Pesenti M, Andres M. 2014. Causal role of spatial attention  
521 in arithmetic problem solving: evidence from left unilateral neglect. *Neuropsychologia*. 60: 1-  
522 9.

523

524 Eger, E., Sterzer, P., Russ, M.O., Giraud, A.L., & Kleinschmidt, A. 2003. A supramodal number  
525 representation in human intraparietal cortex. *Neuron*. 37(4): 719-725.

526

527 Geary DC, Hamson CO, Hoard MK. 2000. Numerical and arithmetical cognition: a longitudinal  
528 study of process and concept deficits in children with learning disability. *J Exp Child Psychol*.  
529 77(3): 236-263.

530

531 Gougoux F, Zatorre RJ, Lassonde M, Voss P, Lepore F. 2005. A functional neuroimaging study  
532 of sound localization: Visual cortex activity predicts performance in early-blind individuals.  
533 *PLoS Biol*. 3: e27.

534

535 Grabner RH, Ansari D, Reishofer G, Stern E, Ebner F, Neuper C. 2007. Individual differences  
536 in mathematical competence predict parietal brain activation during mental calculation.  
537 *Neuroimage*. 38: 346–356.

538



539 Hannagan T, Amedi A, Cohen L, Dehaene-Lambertz G, Dehaene S. 2015. Origins of the  
540 specialization for letters and numbers in ventral occipitotemporal cortex. *Trends Cogn Sci.*  
541 19(7): 374-382.

542

543 Harvey BM, Dumoulin SO. 2017. A network of topographic numerosity maps in human  
544 association cortex. *Nat Hum Behav.* 1: 0036. doi:10.1038/s41562-016-0036.

545

546 Harvey BM, Klein BP, Petridou N, Dumoulin SO .2013. Topographic representation of  
547 numerosity in the human parietal cortex. *Science.* 341(6150): 1123-1126.

548

549 Hasson U, Andric M, Atilgan H, Collignon O. 2016. Congenital blindness is associated with  
550 large-scale reorganization of anatomical networks. *Neuroimage.* 128: 362-372.

551

552 Heimler B, Striem-Amit E, Amedi A. 2015. Origins of task-specific sensory-independent  
553 organization in the visual and auditory brain: neuroscience evidence, open questions and  
554 clinical implications. *Curr Opin Neurobiol.* 35: 169-177.

555

556 Jiang F, Stecker GC, Boynton GM, Fine I. 2016. Early blindness results in developmental  
557 plasticity for auditory motion processing within auditory and occipital cortex. *Front Hum*  
558 *Neurosci.* 10: 324.

559

560 Kanjlia S, Lane C, Feigenson L, Bedny M. 2016. Absence of visual experience modifies the  
561 neural basis of numerical thinking. *Proc Natl Acad Sci U S A.* 113(40): 11172-11177.

562

563 Knops A, Thirion B, Hubbard EM, Michel V, Dehaene S. 2009a. Recruitment of an area  
564 involved in eye movements during mental arithmetic. *Science*. 324: 1583–1585.

565

566 Knops A, Viarouge A, Dehaene S. 2009b. Dynamic representations underlying symbolic and  
567 non-symbolic calculation: Evidence from the operational momentum effect. *Atten Percept*  
568 *Psychophys*. 71 (4): 803–821.

569

570 Lane C, Kanjlia S, Omaki A, Bedny M. 2015. “Visual” cortex of congenitally blind adults  
571 responds to syntactic movement. *J Neurosci*. 35(37): 12859-12868.

572

573 Loetscher T, Bockish CJ, Nicholls MER, Brugger P. 2010. Eye position predicts what number  
574 you have in mind. *Curr Biol*. 20(6): R264-R265.

575

576 Masson N, Pesenti M. 2014. Attentional bias induced by solving simple and complex addition  
577 and subtraction problems. *Q J Exp Psychol*. 67(8): 1514-26.

578

579 McCrink K, Dehaene S, Dehaene-Lambertz G. 2007. Moving along the mental number line:  
580 operational momentum in nonsymbolic arithmetic. *Percept Psychophys*. 69 (8): 1324–1333.

581

582 McLean JF, Hitch GJ. 1999. Working memory impairments in children with specific arithmetic  
583 learning difficulties. *J Exp Child Psychol*. 74(3): 240-260.

584

585 Mizuhara H, Wang LQ, Kobayashi K, Yamaguchi Y. 2005. Long-range EEG phase  
586 synchronization during an arithmetic task indexes a coherent cortical network simultaneously  
587 measured by fMRI. *Neuroimage*. 27(3): 553-563.

588

589 Nieder A. 2012. Supramodal numerosity selectivity of neurons in primate prefrontal and  
590 posterior parietal cortices. *PNAS*. 109(29): 11860-11865.

591

592 Nieder A. (2016). The neuronal code for number. *Nat Rev Neurosci*. 17(6): 366-382.

593

594 Pelland M, Orban P, Dansereau C, Lepore F, Bellec P, Collignon O. 2017. State-dependent  
595 modulation of functional connectivity in early blind individuals. *Neuroimage*. 147: 532-541.

596

597 Piazza M, Pinel P, Le Bihan D, Dehaene S. 2007. A magnitude code common to numerosities  
598 and number symbols in human intraparietal cortex. *Neuron*. 53: 293–305.

599

600 Pinhas M, Fischer M. 2008. Mental movements without magnitude? A study of spatial biases  
601 in symbolic arithmetic. *Cognition*. 109: 408–415.

602

603 Poirier C, Collignon O, Scheiber C, Renier L, Vanlierde A, Tranduy D, Veraart C, De Volder  
604 AG. 2006. Auditory motion perception activates visual motion areas in early blind subjects.  
605 *Neuroimage*. 31(1): 279-285.

606

607 Power JD, Barnes KA, Snyder AZ, Schlaggar BL, Petersen, SE. 2012. Spurious but systematic  
608 correlations in functional connectivity MRI networks arise from subject  
609 motion. *Neuroimage*. 59(3): 2142-2154.

610

611 Reich L, Szwed M, Cohen L, Amedi A. 2011. A ventral visual stream reading center  
612 independent of visual experience. *Curr Biol*. 21(5): 363-368.

613

614 Ricciardi E, Tozzi L, Leo A, Pietrini P. 2014. Modality-dependent cross-modal functional  
615 reorganization following congenital visual deprivation within occipital areas: a meta-analysis  
616 of tactile and auditory studies. *Multisens Res*. 27(3-4): 247-262.

617

618 Ricciardi E, Vanello N, Sani L, Gentili C, Scilingo EP, Landini L, Guazzelli M, Bicchi A, Haxby  
619 JV, Pietrini P. 2007. The effect of visual experience on the development of functional  
620 architecture in hMT+. *Cerebral Cortex*. 17(12): 2933-2939.

621

622 Rickard TC, Romero SG, Basso G, Wharton C, Flitman S, Grafman J. 2000. The calculating  
623 brain: an fMRI study. *Neuropsychologia*. 38 (3): 325-335.

624

625 Röder B, Stock O, Bien S, Neville H, Rösler F. 2002. Speech processing activates visual cortex  
626 in congenitally blind humans. *Eur J Neurosci*. 16(5): 930-936.

627

628 Ross J, Burr DC. 2010. Vision senses number directly. *J Vis*. 10(2):10, 1-8.

629

630 Sadato N, Pascual-Leone A, Grafman J, Ibanez V, Deiber MP, Dold G, Hallett M. 1996.  
631 Activation of the primary visual cortex by Braille reading in blind subjects. *Nature*. 380: 526-  
632 528.  
633  
634 Sathian K, Simon TJ, Peterson S, Patel GA, Hoffman JM, Grafton ST. 1999. Neural evidence  
635 linking visual object enumeration and attention. *J Cogn Neurosci*. 11(1): 36-51.  
636  
637 Satterthwaite TD, Wolf DH, Loughead J, Ruparel K, Elliott MA, Hakonarson H, Gur RC, Gur  
638 RE. 2012. Impact of in-scanner head motion on multiple measures of functional connectivity:  
639 relevance for studies of neurodevelopment in youth. *Neuroimage*. 60(1): 623-632.  
640  
641 Shum J, Hermes D, Foster BL, Dastjerdi M, Rangarajan V, Winawer J, Miller KJ, Parvizi J. 2013.  
642 A brain area for visual numerals. *J Neurosci*. 33(16): 6709-6715.  
643  
644 Siegler RS, Shrager J. 1984. Strategy choices in addition and subtraction: how do children  
645 know what to do? In Sophian C, editor. *The origins of cognitive skills*. Hillsdale: Erlbaum. pp.  
646 229-293.  
647  
648 Simon TJ. 1999. The foundations of numerical thinking in a brain without numbers. *Trends*  
649 *Cogn Sci*. 3: 363-365.  
650  
651 Sladky R, Friston KJ, Tröstl J, Cunnington R, Moser E, Windischberger C. 2011. Slice timing  
652 effects and their correction in functional MRI. *Neuroimage*. 58 (2): 588-594.

653 Stoianov I, Zorzi M. 2012. Emergence of a “visual number sense” in hierarchical generative  
654 models. *Nat Neurosci.* 15(2): 194-196.

655

656 Talairach J, Tournoux P. 1988. Co-planar stereotaxic atlas of the human brain. Thieme: New  
657 York.

658

659 Tschentscher N, Hauk O, Fischer MH, Pulvermüller F. 2012. You can count on the motor  
660 cortex: Finger counting habits modulate motor cortex activation evoked by numbers.  
661 *Neuroimage.* 59: 3139-3148.

662

663 van Ackeren MJ, Barbero FM, Mattioni S, Bottini R, Collignon O. 2017. Neuronal populations  
664 in the occipital cortex of the blind synchronize to the temporal dynamics of speech.  
665 *BioRxiv.* 186338. doi: <https://doi.org/10.1101/186338>.

666

667 Van Dijk KR, Sabuncu MR, Buckner RL. 2012. The influence of head motion on intrinsic  
668 functional connectivity MRI. *Neuroimage.* 59(1): 431-438.

669

670 Walter E, Mazaika PK, Reiss, AL. 2009. Insights into brain development from neurogenetic  
671 syndromes: from fragile X syndrome, Williams syndrome, Turner syndrome and  
672 velocardiofacial syndrome. *Neuroscience.* 164(1): 257-271.

673

674 Weeks R, Horwitz B, Aziz-Sultan A, Tian B, Wessinger CM, Cohen LG, Hallett M, Rauschecker  
675 JP. 2000. A positron emission tomographic study of auditory localization in the congenitally  
676 blind. *J Neurosci.* 20(7): 2664–2672.

677  
678 Whitfield-Gabrieli S, Nieto-Castanon A. 2012. Conn: A functional connectivity toolbox for  
679 correlated and anticorrelated brain networks. *Brain Connectivity.*  
680 doi:10.1089/brain.2012.0073.

681  
682 Wu S, Chang TT, Majid A, Caspers S, Eickhoff SB, Menon V. 2009. Functional heterogeneity  
683 of inferior parietal cortex during mathematical cognition assessed with cytoarchitectonic  
684 probability maps. *Cereb Cortex.* 19 (12): 2930-2945.

685  
686 Yantis S, Serences JT. 2003. Cortical mechanisms of space-based and object-based  
687 attentional control. *Curr Opin Neurobiol.* 13(2): 187-193.

688  
689 Zhou X, Chen C, Zang Y, Dong Q, Chen C, Qiao S, Gong Q. 2007. Dissociated brain  
690 organization for single digit addition and multiplication. *Neuroimage.* 35 (2): 871-880.

691

692

693

694

695

696 **Table 1.** Functional results summarizing the main effect of groups for the different contrasts  
 697 of interests

| Area                                                                                           | Cluster<br>Size( $\Phi$ ) | x   | y   | z  | Z    | p      |
|------------------------------------------------------------------------------------------------|---------------------------|-----|-----|----|------|--------|
| <b>(A) [SC <math>\cap</math> CB] [Subtraction <math>\cap</math> Multiplication &gt;Letter]</b> |                           |     |     |    |      |        |
| L AG – L PSPL                                                                                  | 89                        | -40 | -74 | 26 | 3.03 | 0.02*  |
| <b>(B) [CB &gt; SC] [Subtraction <math>\cap</math> Multiplication &gt;Letter]</b>              |                           |     |     |    |      |        |
| L MOG                                                                                          | 321                       | -34 | -86 | 24 | 3.98 | 0.001* |
| <b>(C) [SC <math>\cap</math> CB] [Subtraction &gt; Multiplication]</b>                         |                           |     |     |    |      |        |
| L FEF                                                                                          | 426                       | -26 | -2  | 54 | 2.63 | 0.04#  |
| R FEF                                                                                          | 124                       | 22  | -2  | 56 | 3.66 | 0.004* |
| L PSPL                                                                                         | 2818                      | -20 | -68 | 46 | 4.06 | 0.001* |
| R PSPL                                                                                         |                           | 24  | -68 | 46 | 4.10 | 0.001* |
| R Middle Frontal Gyrus                                                                         | 53                        | 32  | 36  | 24 | 3.25 | 0.01*  |
| <b>(D) [CB &gt; SC] [Subtraction &gt; Multiplication]</b>                                      |                           |     |     |    |      |        |
| R MOG                                                                                          | 156                       | 36  | -82 | 8  | 3.55 | 0.006* |



(E) [SC  $\cap$  CB] [Multiplication >

Subtraction]

R STG 104 64 -14 -8 3.48 0.007\*

---

698 Brain activations significant ( $p_{\text{corr}} < .05$  FWE) after correction over (\*) small spherical  
699 volumes (SVC, 10 mm radius) or (#) over the whole brain. ( $\Phi$ ) Number of voxels in specific  
700 clusters when displayed at  $p(\text{uncorr}) < 0.001$  SC: sighted controls, CB: congenitally blind, L:  
701 left, R: Right, AG: angular gyrus; STG: superior temporal gyrus; PSPL: posterior superior  
702 parietal lobule; FEF : frontal eye field; MOG : middle occipital gyrus.

703

704

705

706

707

708

709

710

711

712

713

714 **Table 2.** Brain regions correlated with left and right middle occipital gyrus at rest.

| Area                                               | Cluster<br>Size( $\Phi$ ) | x   | y   | z   | Cluster<br>$P_{FDR}$ |
|----------------------------------------------------|---------------------------|-----|-----|-----|----------------------|
| <b><u>Correlation with L MOG in blind &gt;</u></b> |                           |     |     |     |                      |
| <b><u>sighted</u></b>                              |                           |     |     |     |                      |
| Lingual gyrus                                      | 176                       | 0   | -34 | 42  | 0.000132             |
| L angular gyrus                                    | 151                       | -50 | -52 | 48  | 0.000250             |
| L cingulate gyrus                                  | 142                       | -6  | 22  | 46  | 0.000273             |
| R inferior precentral sulcus (premotor<br>cortex)  | 115                       | 54  | 8   | 40  | 0.000973             |
| R retrosplenial cortex                             | 105                       | 10  | -46 | 18  | 0.001427             |
| L fusiform gyrus                                   | 78                        | -32 | -68 | -12 | 0.006271             |
| L middle frontal gyrus                             | 75                        | -38 | 8   | 40  | 0.006271             |
| L inferior frontal gyrus                           | 75                        | -44 | 46  | 6   | 0.006271             |
| L thalamus                                         | 73                        | -8  | -16 | 10  | 0.006402             |
| L occipito-temporal cortex                         | 59                        | -20 | -46 | -8  | 0.015785             |
| L IPS                                              | 51                        | -32 | 8   | 28  | 0.024218             |
| L posterior collateral sulcus                      | 51                        | -24 | -68 | -8  | 0.024218             |

|                            |    |     |     |     |          |
|----------------------------|----|-----|-----|-----|----------|
| L inferior occipital gyrus | 50 | -38 | -86 | -12 | 0.024218 |
|----------------------------|----|-----|-----|-----|----------|

|                     |    |    |     |    |          |
|---------------------|----|----|-----|----|----------|
| Posterior cingulate | 41 | -2 | -40 | 24 | 0.046822 |
|---------------------|----|----|-----|----|----------|

**Correlation with R MOG in blind >**

**sighted**

|                            |     |    |     |    |          |
|----------------------------|-----|----|-----|----|----------|
| R inferior parietal lobule | 213 | 48 | -62 | 28 | 0.000012 |
|----------------------------|-----|----|-----|----|----------|

|                     |     |    |     |     |          |
|---------------------|-----|----|-----|-----|----------|
| L cerebellum crus 2 | 207 | -8 | -80 | -32 | 0.000012 |
|---------------------|-----|----|-----|-----|----------|

|                                   |     |    |     |    |          |
|-----------------------------------|-----|----|-----|----|----------|
| L precuneus – posterior cingulate | 184 | -2 | -44 | 10 | 0.000025 |
|-----------------------------------|-----|----|-----|----|----------|

|                            |     |     |     |     |          |
|----------------------------|-----|-----|-----|-----|----------|
| L inferior occipital gyrus | 127 | -30 | -86 | -18 | 0.000426 |
|----------------------------|-----|-----|-----|-----|----------|

|                                 |    |    |    |    |          |
|---------------------------------|----|----|----|----|----------|
| R middle/inferior frontal gyrus | 86 | 46 | 20 | 30 | 0.003921 |
|---------------------------------|----|----|----|----|----------|

|                 |    |    |     |   |          |
|-----------------|----|----|-----|---|----------|
| R lingual gyrus | 85 | 12 | -92 | 0 | 0.003921 |
|-----------------|----|----|-----|---|----------|

|                            |    |    |     |    |          |
|----------------------------|----|----|-----|----|----------|
| R inferior occipital gyrus | 80 | 34 | -92 | -8 | 0.004716 |
|----------------------------|----|----|-----|----|----------|

|                        |    |    |    |    |          |
|------------------------|----|----|----|----|----------|
| R middle frontal gyrus | 78 | 48 | 16 | 46 | 0.004735 |
|------------------------|----|----|----|----|----------|

|                  |    |    |     |     |          |
|------------------|----|----|-----|-----|----------|
| R fusiform gyrus | 76 | 34 | -68 | -14 | 0.004835 |
|------------------|----|----|-----|-----|----------|

|                |    |     |     |     |          |
|----------------|----|-----|-----|-----|----------|
| L inferior LOC | 61 | -44 | -82 | -14 | 0.011676 |
|----------------|----|-----|-----|-----|----------|

|                            |    |    |     |     |          |
|----------------------------|----|----|-----|-----|----------|
| R inferior temporal cortex | 61 | 34 | -46 | -18 | 0.011676 |
|----------------------------|----|----|-----|-----|----------|

|                          |    |    |    |    |          |
|--------------------------|----|----|----|----|----------|
| R superior frontal gyrus | 55 | 30 | 32 | 54 | 0.014493 |
|--------------------------|----|----|----|----|----------|

|                  |    |    |     |     |          |
|------------------|----|----|-----|-----|----------|
| R fusiform gyrus | 55 | 54 | -62 | -18 | 0.014493 |
|------------------|----|----|-----|-----|----------|

|                             |    |     |     |     |          |
|-----------------------------|----|-----|-----|-----|----------|
| L fusiform gyrus            | 55 | -48 | -62 | -18 | 0.014493 |
| L cerebellum/posterior lobe | 45 | -26 | -62 | -32 | 0.030143 |
| L thalamus                  | 39 | -8  | -10 | 6   | 0.047029 |

---

715

716

717

718

719

720

721

722

723

724

725

726

727

728

729

730

731

732

733

734 FIGURES

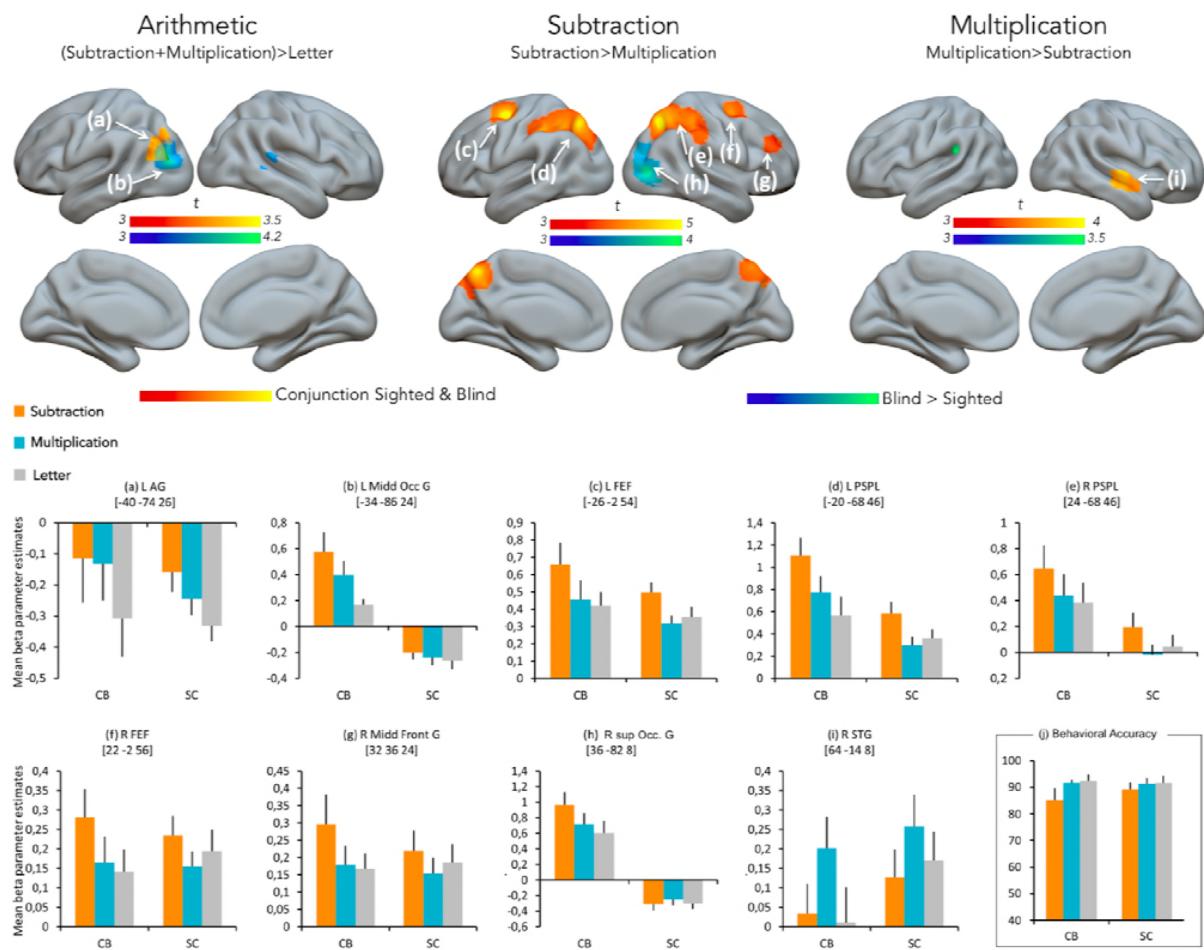

735

736 **Figure 1.** Results of the whole brain univariate analyses. Task-related brain activity common  
 737 to both groups ( $p_{uncorr} < .002$ ,  $k > 15$ ) and specific to the blind group ( $p_{uncorr} < .001$ ,  $k >$   
 738  $15$ ). There were no activations specific to the sighted group. Color bars represent t-values.  
 739 Lower part (a-i): for illustration, mean activity estimates (arbitrary units  $\pm$  SEM) associated with  
 740 arithmetic, subtraction and multiplication are plotted for blind and sighted at significant  
 741 peaks. See Table 1 for a list of brain regions depicted in this figure. (j) Behavioral results. Mean  
 742 and standard error of accuracy scores (percentage of correct responses) per condition and  
 743 group.

744

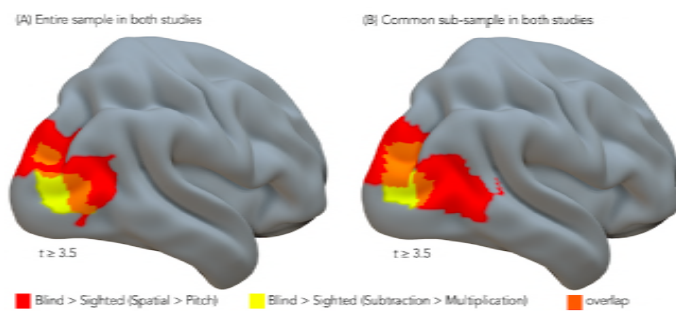

745

746 **Figure 2.** Consistency across studies. The middle occipital gyrus, showing functional  
747 preference for subtraction in our study overlapped in part with regions showing selective  
748 tuning to auditory spatial processing in the blind (Collignon et al., 2011). Test-consistency  
749 either included (A) the entire sample of blind participants in both studies or (B) only the  
750 blind participants who performed both studies (N = 7).

751

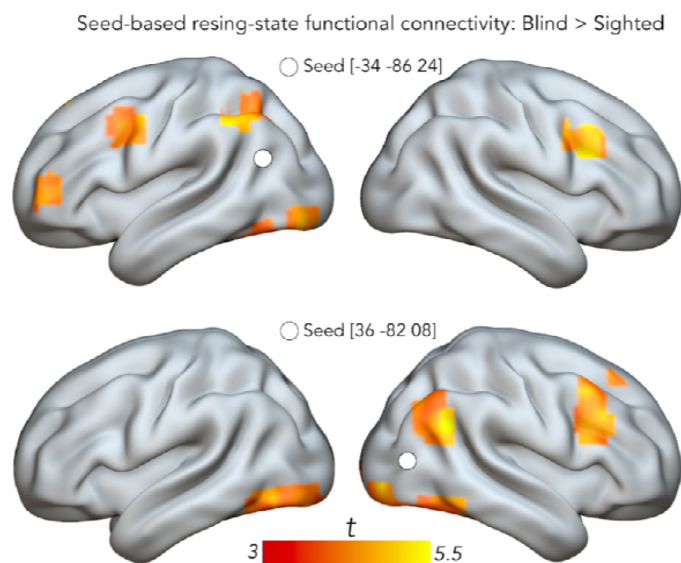

752

753 **Figure 3.** Brain regions more correlated with left and right MOG in blind (n = 13) relative to  
754 sighted (n = 11) individuals in resting-state data ( $P < 0.05$ , FDR corrected). Left and right  
755 MOG seeds shown in white.

756

### Arithmetic (Subtraction+Multiplication)>Letter

### Subtraction Subtraction>Multiplication

### Multiplication Multiplication>Subtraction

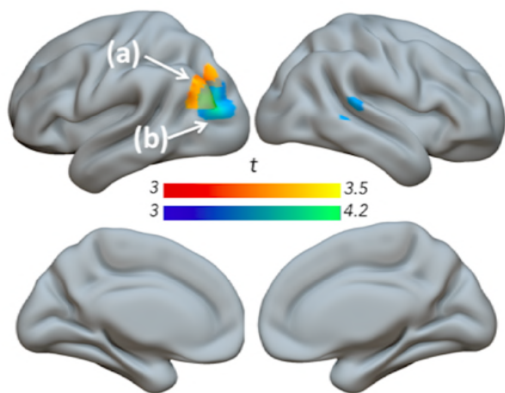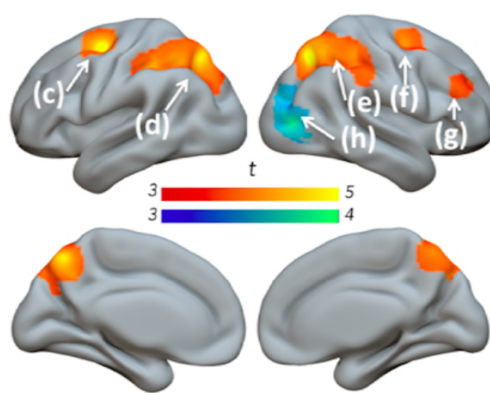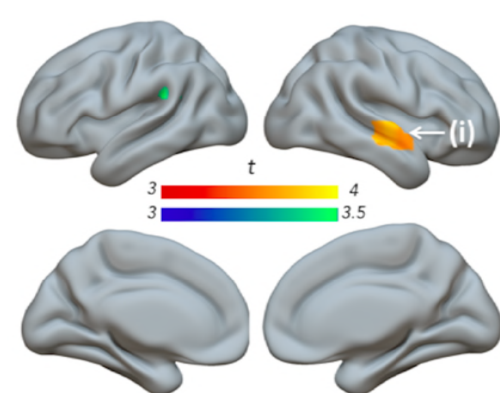

■ Subtraction
 ■ Multiplication
 ■ Letter

— Conjunction Sighted & Blind
 — Blind > Sighted

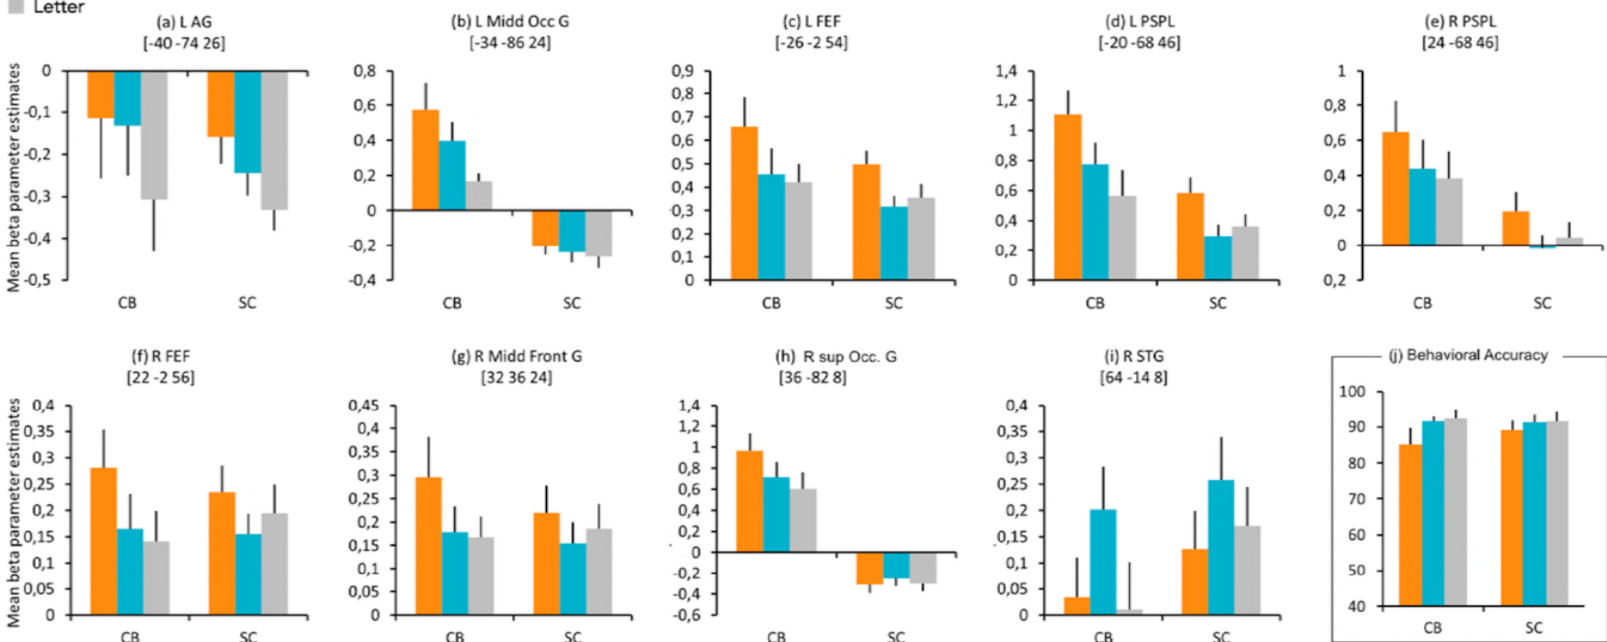

(A) Entire sample in both studies

(B) Common sub-sample in both studies

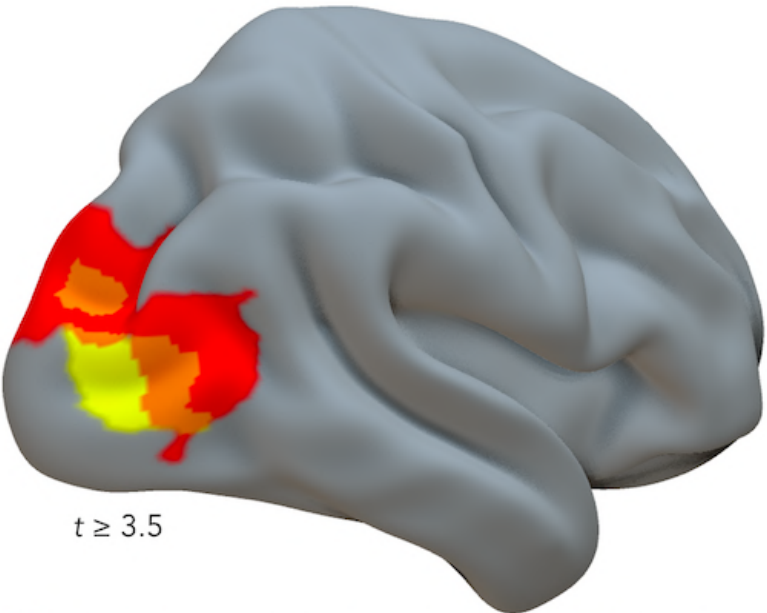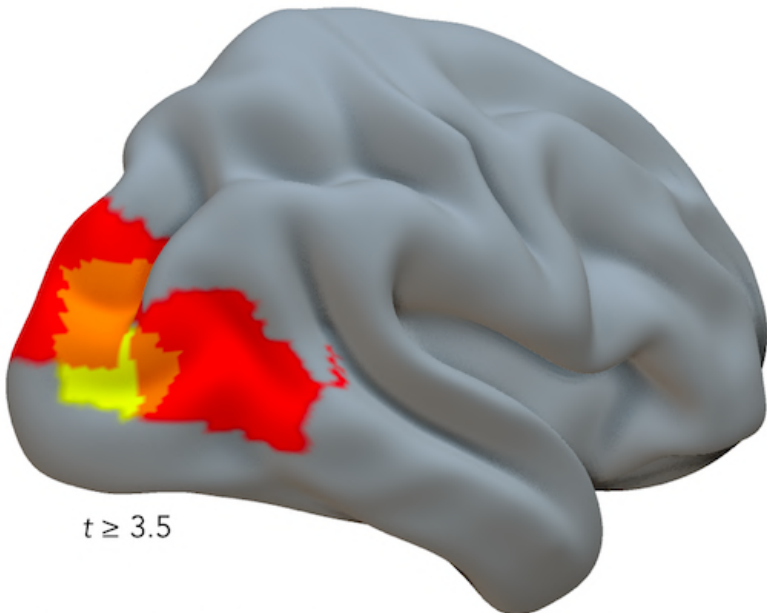

■ Blind > Sighted (Spatial > Pitch)    ■ Blind > Sighted (Subtraction > Multiplication)    ■ overlap



Seed-based resting-state functional connectivity: Blind > Sighted

○ Seed [-34 -86 24]

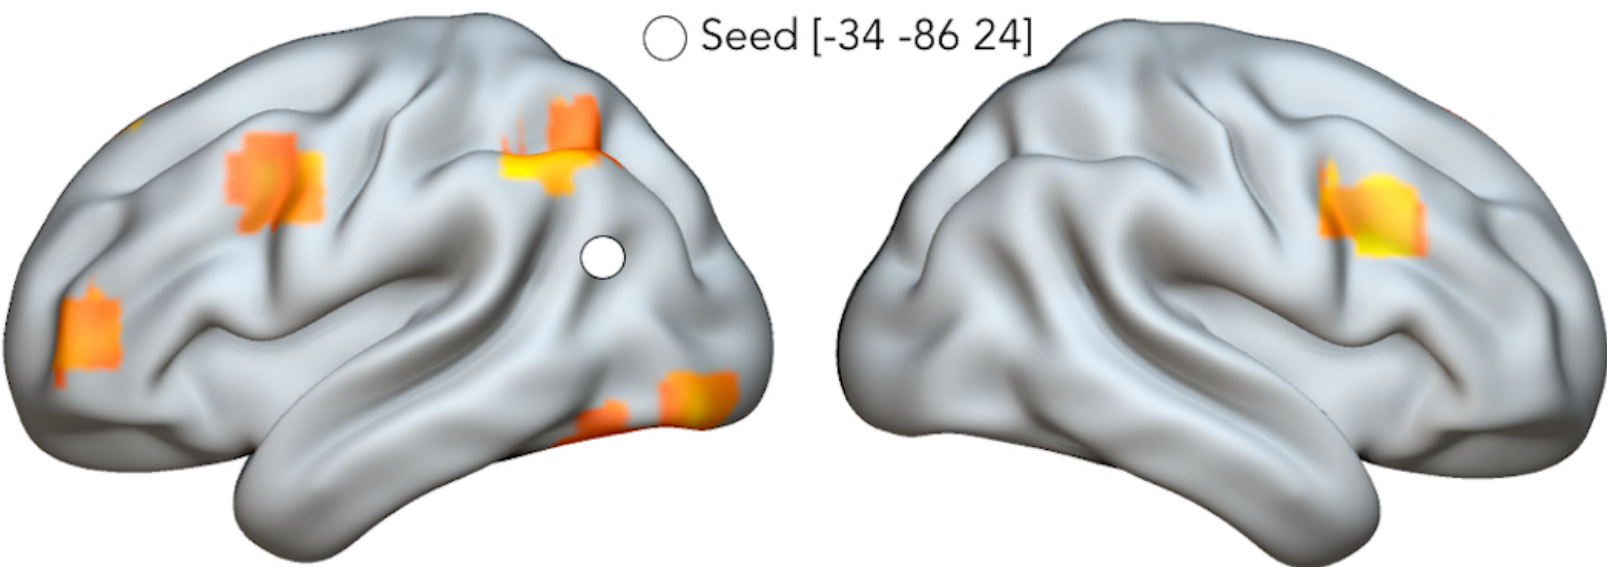

○ Seed [36 -82 08]

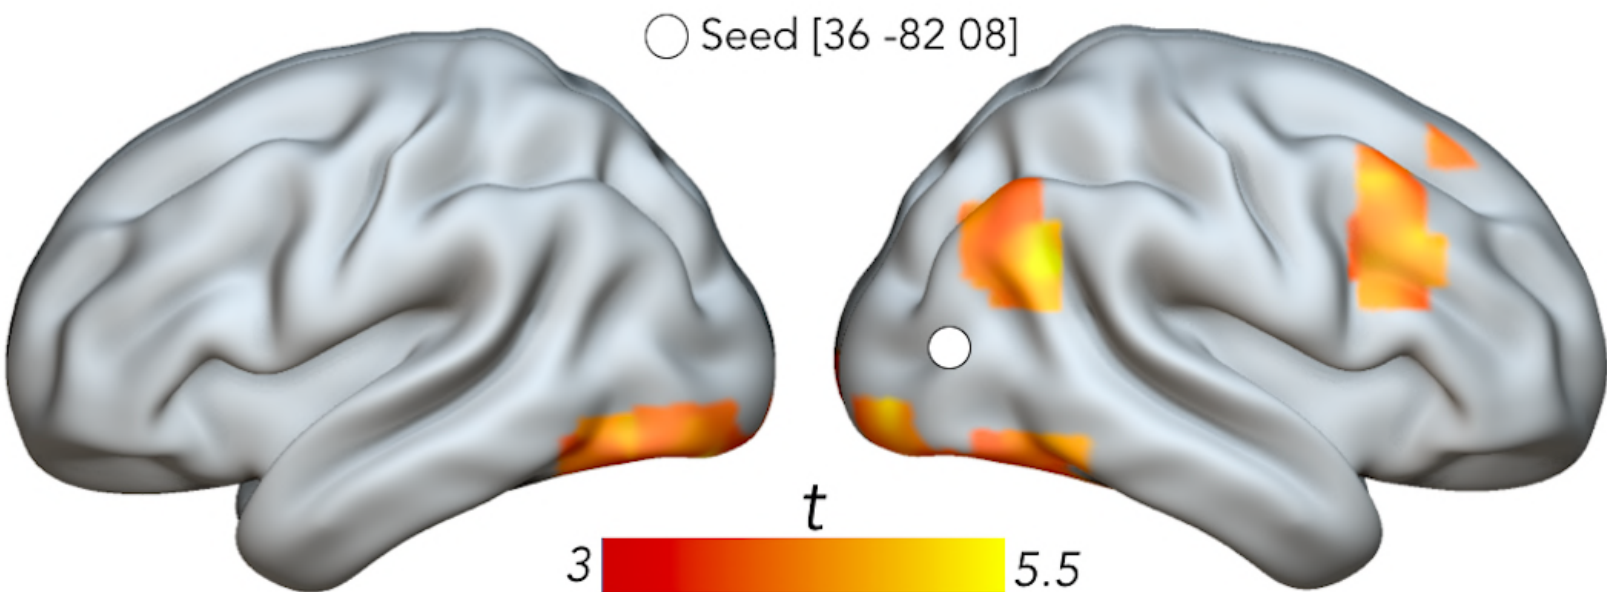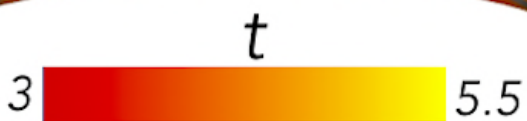

Source: https://www.biorxiv.org/content/10.1101/319343v1.full.pdf
